# Supplementary material
Source: ML conference proceedings conference paper supplement (https://openaccess.thecvf.com/content/WACV2021/html/Mounsaveng_Learning_Data_Augmentation_WACV_2021_paper.html)
Supplement: Supplementary file 1 [file Mounsaveng_Learning_Data_Augmentation_WACV_2021_supplemental.pdf]

# Learning Data Augmentation with Online Bilevel Optimization for Image Classification

Saypraseuth Mounsaveng<sup>\*1</sup>, Issam Laradji<sup>2</sup>, Ismail Ben Ayed<sup>1</sup>, David Vázquez<sup>2</sup>, Marco Pedersoli<sup>1</sup>  
<sup>1</sup>ÉTS Montreal <sup>2</sup>Element AI

## 1. Implementation details

We use PyTorch to implement our experiments, and Kornia library for the color transformations.

### 1.1. Model architecture

Tab. 1 shows the BadGAN classifier architecture. Tab. 2 shows the augmenter network for affine and color transformations.

| Classifier C                          |  |
|---------------------------------------|--|
| Input 32x32 Image                     |  |
| 3x3 conv. 96 LReLU(0.2)               |  |
| 3x3 conv. 96 LReLU(0.2)               |  |
| 3x3 conv. 96 LReLU(0.2), 0.5 dropout  |  |
| 3x3 conv. 192 LReLU(0.2)              |  |
| 3x3 conv. 192 LReLU(0.2)              |  |
| 3x3 conv. 192 LReLU(0.2), 0.5 dropout |  |
| 3x3 conv. 192 LReLU(0.2)              |  |
| 3x3 conv. 192 LReLU(0.2)              |  |
| 3x3 conv. 192 LReLU(0.2)              |  |
| MLP 10 unit, sigmoid                  |  |
| 10-class Softmax                      |  |

Table 1: BadGAN classifier network.

| Augmenter A             |                   |                   |
|-------------------------|-------------------|-------------------|
| Small                   | Medium            | Large             |
| Input $n^*$ dim.        | Input 100 dim.    | Input 100 dim.    |
| MLP $n$ units           | MLP 64 unit       | MLP 512 unit      |
| relu, 0.2 dropout       | relu, 0.2 dropout | relu, 0.2 dropout |
| MLP $10 \times n$ units | MLP 32 unit       | MLP 1024 unit     |
| relu, 0.2 dropout       | relu, 0.2 dropout | relu, 0.2 dropout |
| -                       | -                 | MLP 1024 unit     |
| -                       | -                 | relu, 0.2 dropout |
| -                       | -                 | MLP 512 unit      |
| -                       | -                 | relu, 0.2 dropout |
| MLP $n$ units, tanh     |                   |                   |

Table 2: Augmenter network for affine and color transformations. For *Small*,  $n$  is the number of parameters to learn (6 for affine, 4 for color and 10 when combining both).

### 1.2. Affine transformation parameters

In our experiments with affine transformations, the augmenter network learns a 2x3 matrix containing the parameters of the affine transformations.

### 1.3. Color transformation parameters

In our experiments with color transformations, the augmenter network outputs 1 value per transformation. Those values are in a range depending on the transformation: i) Hue in range [-0.5:0.5]; ii) Saturation in range [0:1]; iii) Contrast in range [-1:1] iv) Brightness in range [0:1]. In all cases the zero value corresponds to the identity transformation.

## 2. Additional experiments

We investigate the influence of augmenter regularization on the model performance. Figure 1 shows the model performance for different weight decay values. This indicates that the model is not sensitive to regularization.

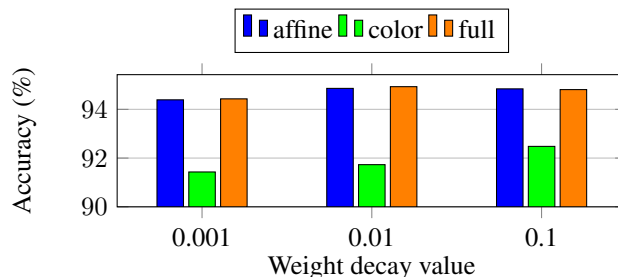

Figure 1: Augmenter regularization. Accuracy for different weight decay values for the augmenter (affine, color and the combination of both) with ResNet18 on CIFAR10.
